# Supplementary material
Source: HighWire-hosted journal article supplement (https://bmjopen.bmj.com/content/7/9/e016713)
Supplement: inline-supplementary-material-1 [file inline-supplementary-material-1.pdf]

**Supplementary file 1 Read codes**

| Condition    | Included (including exception reporting)                                                                                                                                                                         | Excluded       |
|--------------|------------------------------------------------------------------------------------------------------------------------------------------------------------------------------------------------------------------|----------------|
| Hypertension | G2...<br>G20..%<br>G24.. - G2z.. (Excluding G24z1, G2400, G2410, G27..)<br>Gyu2.<br>Gyu20                                                                                                                        | 21261<br>212K. |
| COPD         | H3...<br>H31..% (excluding H3101, H31y0, H3122)<br>H32..%<br>H36.. - H3z.. (excluding H3y0., H3y1.)<br>H4640<br>H4641<br>H5832<br>Hyu30<br>Hyu31                                                                 | 2126F          |
| Depression   | E0013,<br>E0021<br>E112.%,<br>E113.%,<br>E118.,<br>E11y2<br>E11z2,<br>E130.<br>E135.<br>E2003<br>E291.,<br>E2B..<br>E2B1.,<br>Eu204<br>Eu251<br>Eu32.% (excluding Eu32A, Eu32B, Eu329) Eu33.%,<br>Eu341<br>Eu412 | 212S.          |
| Diabetes     | C10.,<br>C109J,<br>C109K,<br>C10C.,<br>C10D.,<br>C10E.%,<br>C10F.% (Excluding C10F8),                                                                                                                            | 21263<br>212H. |

|                |                                                                                                                                                                                                                                                                                                              |                |
|----------------|--------------------------------------------------------------------------------------------------------------------------------------------------------------------------------------------------------------------------------------------------------------------------------------------------------------|----------------|
|                | C10G.%,<br>C10H.%,<br>C10M.%,<br>C10N.%,<br>PKyP.,<br>C10P.%,<br>C10Q.                                                                                                                                                                                                                                       |                |
| Hypertension   | G2...<br>G20..%<br>G24.. - G2z.. (Excluding G24z1,<br>G2400, G2410, G27..)<br>Gyu2.<br>Gyu20                                                                                                                                                                                                                 | 21261<br>212K. |
| Osteoarthritis | N05..00      Osteoarthritis<br>and allied disorders                                                                                                                                                                                                                                                          |                |
| CKD            | 1Z12.<br>1Z13.<br>1Z14.<br>1Z15.<br>1Z16.<br>1Z1B. - 1Z1L.<br>1Z1T.<br>1Z1V.<br>1Z1W.<br>1Z1X.<br>1Z1Y.<br>1Z1Z.<br>1Z1a.<br>1Z1b.<br>1Z1c.<br>1Z1d.<br>1Z1e.<br>1Z1f.<br>K053.<br>K054.<br>K055.<br>1Z10.<br>1Z11.<br>1Z17. - 1Z1A.<br>1Z1M.<br>1Z1Q.<br>K051.<br>K052.<br>1Z1N.<br>1Z1P.<br>1Z1R.<br>1Z1S. | 2126E          |
